## 1 **Chromosome-scale genome assembly of bread wheat's wild relative *Triticum timopheevii***

2

3 Surbhi Grewal<sup>1</sup>, Cai-yun Yang<sup>1</sup>, Duncan Scholefield<sup>1</sup>, Stephen Ashling<sup>1</sup>, Sreya Ghosh<sup>2</sup>, David  
4 Swarbreck<sup>2</sup>, Joanna Collins<sup>3</sup>, Eric Yao<sup>4,5</sup>, Taner Z. Sen<sup>4,5</sup>, Michael Wilson<sup>6</sup>, Levi Yant<sup>6</sup>, Ian P. King<sup>1</sup> and  
5 Julie King<sup>1</sup>

6

7 1. Wheat Research Centre, Department of Plant and Crop Sciences, School of Biosciences, University  
8 of Nottingham, Loughborough, LE12 5RD, UK

9 2. Earlham Institute, Norwich Research Park, Norwich NR4 7UZ, UK

10 3. Genome Reference Informatics Team, Wellcome Sanger Institute, Wellcome Trust Genome  
11 Campus, Hinxton, CB10 1RQ, UK

12 4. University of California, Department of Bioengineering, Berkeley, CA, 94720, USA

13 5. United States Department of Agriculture—Agricultural Research Service, Western Regional  
14 Research Center, Crop Improvement and Genetics Research Unit, 800 Buchanan St., Albany, CA  
15 94710, USA

16 6. University of Nottingham, University Park, Nottingham, NG7 2RD

17 Corresponding author: Surbhi Grewal ([surbhi.grewal@nottingham.ac.uk](mailto:surbhi.grewal@nottingham.ac.uk))

18

### 19 **Abstract**

20

21 Wheat (*Triticum aestivum*) is one of the most important food crops with an urgent need for increase  
22 in its production to feed the growing world. *Triticum timopheevii* ( $2n = 4x = 28$ ) is an allotetraploid  
23 wheat wild relative species containing the A<sup>t</sup> and G genomes that has been exploited in many pre-  
24 breeding programmes for wheat improvement. In this study, we report the generation of a  
25 chromosome-scale reference genome assembly of *T. timopheevii* accession PI 94760 based on PacBio  
26 HiFi reads and chromosome conformation capture (Hi-C). The assembly comprised a total size of  
27 9.35 Gb, featuring a contig N50 of 42.4 Mb, and 166,325 predicted gene models. DNA methylation  
28 analysis showed that the G genome had on average more methylated bases than the A<sup>t</sup> genome. The  
29 G genome was also more closely related to the S genome of *Aegilops speltoides* than to the B  
30 genome of hexaploid or tetraploid wheat. In summary, the *T. timopheevii* genome assembly provides  
31 a valuable resource for genome-informed discovery of agronomically important genes for food  
32 security.

33

### 34 **Background and Summary**

35

36 The *Triticum* genus comprises many wild and cultivated wheat species including diploid, tetraploid  
37 and hexaploid forms. The polyploid species originated after hybridisation between *Triticum* and the  
38 neighbouring *Aegilops* genus (goatgrass). The tetraploid species, *Triticum turgidum* ( $2n = 4x = 28$ ,  
39 AABB), also known as emmer wheat, and *Triticum timopheevii* ( $2n = 4x = 28$ , A<sup>t</sup>A<sup>t</sup>GG) are  
40 polyphyletic. *Triticum urartu* Thum. ex Gandil ( $2n = 2x = 14$ , AA) is the A genome donor for both  
41 these species<sup>1</sup> whereas, the B and G genomes are closely related to the S genome of *Aegilops*  
42 *speltoides*<sup>2</sup>. Both tetraploid species have wild and domesticated forms, i.e., *T. turgidum* L. ssp.  
43 *dicoccoides* (Körn. ex Asch. & Graebn.) Thell. and ssp. *dicoccum* (Schrank ex Schübl.) Thell.,  
44 respectively, and *T. timopheevii* (Zhuk.) Zhuk. ssp. *armeniicum* (Jakubz.) Slageren and ssp.  
45 *timopheevii*, respectively. Additionally, tetraploid durum wheat *T. turgidum* L. ssp. *durum* (Desf.)  
46 Husn. ( $2n = 4x = 28$ , AABB), used for pasta production, and hexaploid bread wheat *Triticum aestivum*  
47 L. ( $2n = 6x = 42$ , AABBDD) evolved from domesticated emmer wheat with the latter originating  
48 through hybridisation with *Aegilops tauschii* (D genome donor) 6,000-7,000 years ago. Hexaploid  
49 *Triticum zhukovskiyi* (AAGGA<sup>m</sup>A<sup>m</sup>) originated from hybridisation of cultivated *T. timopheevii* and  
50 cultivated einkorn *Triticum monococcum*<sup>3</sup> ( $2n = 2x = 14$ , A<sup>m</sup>A<sup>m</sup>).

51

52 The G genome is only found in *T. timopheevii* and *T. zhukovskyi* and is virtually identical to the S  
53 genome on a molecular level<sup>4,5</sup> but differs from it, and the B genome, due to a number of  
54 chromosomal rearrangements and translocations involving the A<sup>t</sup> genome<sup>6</sup>. The most studied are the  
55 6A<sup>t</sup>/1G/4G and 4G/4A<sup>t</sup>/3A<sup>t</sup> translocations in *T. timopheevii*<sup>7-10</sup>.

56

57 *Triticum timopheevii* ssp. *timopheevii* has been exploited in various studies for wheat improvement  
58 as it has been shown to be an abundant source for genetic variation for many traits such as  
59 resistance to leaf rust<sup>11-13</sup>, stem rust<sup>14-16</sup>, powdery mildew<sup>16-18</sup>, fusarium head blight<sup>19,20</sup> Hessian fly,  
60 Septoria blotch, wheat curl mite and tan spot<sup>21</sup>. It has also been shown to have tolerance to abiotic  
61 stresses such as salinity<sup>22,23</sup> and be a good source for traits affecting grain quality such as milling yield  
62 and grain protein<sup>24</sup> and grain mineral content<sup>25</sup>. During sequence analysis of reference quality  
63 assemblies (RQA) of 10 wheat cultivars, recent studies found two of them, cv. LongReach Lancer and  
64 cv. Julius, contained major introgressions on Chr2B (among others) potentially originating from *T.*  
65 *timopheevii*<sup>26,27</sup>. Introgressions from *T. timopheevii* have also been found in many other wheat  
66 accessions present in genebank collections<sup>28</sup>. Pre-breeding programmes involving the introgression  
67 of the whole genome of *T. timopheevii*, in small segments, into bread wheat<sup>10,29</sup> with diagnostic KASP  
68 markers that can track these introgressions in wheat<sup>29,30</sup> have provided promising new germplasm  
69 and tools to the wheat research community.

70

71 In this study, we report a chromosome-scale reference genome sequence assembly for *T. timopheevii*  
72 by integrating chromatin conformation capture (Hi-C) derived short-reads<sup>31</sup> with PacBio HiFi long-  
73 reads<sup>32</sup>. The assembly was annotated for gene models and repeats. CpG methylation along the  
74 chromosomes was inferred from the PacBio CCS data. Known chromosomal translocations within  
75 and between the A<sup>t</sup> and G genomes were confirmed, and new chromosome rearrangements were  
76 found in comparison to wild emmer wheat. The high-quality *T. timopheevii* genome assembly  
77 obtained in this study provides a reference for the G genome of the *Triticum* genus. This new  
78 resource will form the basis to study chromosome rearrangements across different Triticeae species  
79 and will be explored to detect A<sup>t</sup> and G genome introgressions in durum and bread wheat allowing  
80 future genome-informed gene discoveries for various agronomic traits.

81

## 82 **Methods**

83

### 84 **Plant material, nucleic acid extraction and sequencing**

85

86 High molecular weight (HMW) DNA was extracted from a young seedling (dark-treated for 48 hours)  
87 of *T. timopheevii* accession PI 94760 (United States National Plant Germplasm System, NPGS  
88 available at <https://npgsweb.ars-grin.gov/gringlobal/search>) using a modified Qiagen Genomic DNA  
89 extraction protocol (<https://doi.org/10.17504/protocols.io.bafmibk6>)<sup>33</sup>. DNA was sheared to the  
90 appropriate size range (15–20 kb) and PacBio HiFi sequencing libraries were constructed by  
91 Novogene (UK) Company Limited. Sequencing was performed on 10 SMRT cells of the PacBio Sequel  
92 II system in CCS mode with kinetics option to generate ~267 Gb (~28-fold coverage) of long HiFi reads  
93 (Table S1). Four Hi-C libraries were prepared using leaf samples (from the same plant used for HMW  
94 DNA extraction), at Phase Genomics (Seattle, USA) using the Proximo<sup>®</sup> Hi-C Kit for plant tissues  
95 according to the manufacturer's protocol. The Hi-C libraries were sequenced on an Illumina NovaSeq  
96 6000 S4 platform to generate ~2.8 billion of paired end 150bp reads (~842 Gb raw data; ~89-fold  
97 coverage; Table S2).

98

99 Total RNA was extracted from seedlings (3-leaf stage), seedlings at dusk, roots, flag leaves, spikes and  
100 grains. Flag leaf and whole spike were collected at 7 days post-anthesis and whole grains were  
101 collected at 15 days post-anthesis. In brief, 100 mg of ground powder from each tissue was used for  
102 RNA isolation using the RNeasy Plant Mini Kit (#74904, QIAGEN Ltd UK) following manufacturer's

103 instructions. The RNA samples were split into 2 aliquots, one for mRNA sequencing (RNA-Seq) and  
104 one for Iso-Seq<sup>34</sup>. Library construction for both types of sequencing was carried out by Novogene  
105 (UK) Company Limited. Illumina NovaSeq 6000 S4 platform was used for mRNA sequencing to  
106 generate on average 450 million reads (~67 Gb of 2 x 150bp reads) for each sample (Table S3). The  
107 second set of RNA aliquots from each of the six tissues were pooled into one sample and sequenced  
108 on the PacBio Sequel II system using the Iso-Seq pipeline to generate 4.47 Gb of Iso-Seq data (Table  
109 S4) which was analysed using PacBio Iso-Seq analysis pipeline (SMRT Link v12.0.0.177059).

110

111 Plants were grown in a glasshouse in 2L pots containing John Innes No. 2 soil and maintained at 18 –  
112 25 °C under 16 h light and 8 h dark conditions. All sequencing was carried out by Novogene (UK)  
113 Company Limited.

114

### 115 Cleaning of sequencing data

116

117 The HiFi sequencing read files in BAM format were converted and combined into one fastq file using  
118 bam2fastq v1.3.1 (available at <https://github.com/jts/bam2fastq>). Reads with PacBio adapters were  
119 removed using cutadapt v4.1<sup>35</sup> with parameters: --error-rate=0.1 --times=3 --overlap=35 --  
120 action=trim --revcomp --discard-trimmed. Hi-C reads were trimmed to remove Illumina adapters  
121 using Trimmomatic v0.39<sup>36</sup> with parameters ILLUMINACLIP:TruSeq3-PE-  
122 2.fa:2:30:10:2:keepBothReads SLIDINGWINDOW:4:20 MINLEN:40 CROP:150.

123

### 124 Genome size estimation

125

126 The size of the *T. timopheevii* genome was estimated by using k-mer ( $k=32$ ) distribution analysis  
127 with Jellyfish v2.2.10<sup>37</sup> on the cleaned HiFi reads<sup>38</sup>. A k-mer count histogram was generated and the  
128 size of the *T. timopheevii* genome was estimated as ~9.46 Gb with heterozygosity of 0.001% (Fig. 1),  
129 using GenomeScope v2.0<sup>39</sup> (available at <http://qb.cshl.edu/genomescope/genomescope2.0/>) with  
130 parameters: ploidy = 2, k-mer length = 32, max k-mer coverage = 1000000 and average k-mer  
131 coverage = 10.

132

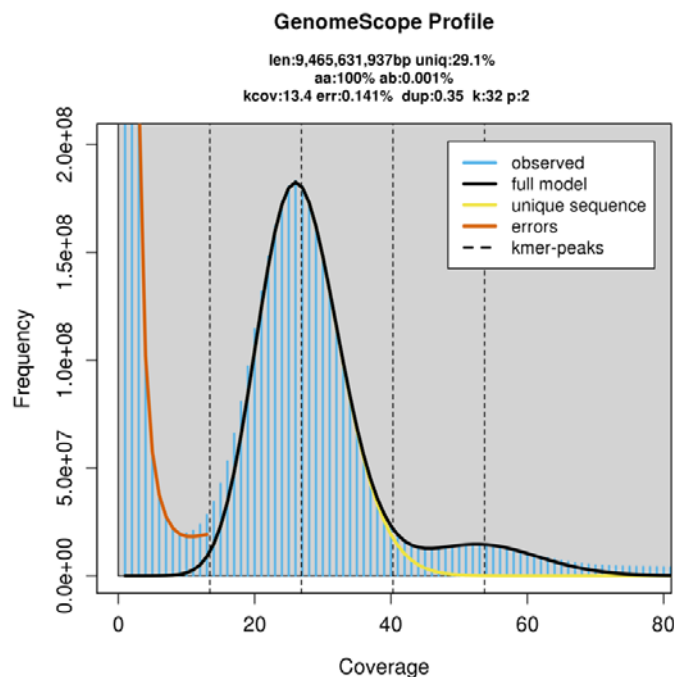

133

134

135 **Figure 1.** Genomescope profile for 32-mers based on HiFi reads.

136

### 137 **Chromosome-scale genome assembly**

138

139 The cleaned HiFi reads were assembled into the initial set of contigs using hifiasm v0.16.1<sup>40</sup> with  
140 default parameters for an inbred species (-l 0) and the dataset was assessed using gfastats v1.3.1<sup>41</sup>.  
141 The contig assembly had a total size of ~9.41 Gb, with a contig N50 value of 43.12 Mb. Genome  
142 completeness was assessed using the Benchmarking Universal Single-Copy Orthologs (BUSCO  
143 v5.3.2)<sup>42</sup> program with the embryophyta\_odb10 database which yielded 99% of the complete BUSCO  
144 genes. Contaminants (contigs other than those categorised as Streptophyta or no hit) were identified  
145 using BlobTools v1.1.1<sup>43</sup> and removed.

146

147 To achieve chromosome-level assembly, the trimmed Hi-C data<sup>44</sup> was mapped onto the  
148 decontaminated contig assembly using the Arima Genomics<sup>®</sup> mapping pipeline (available at  
149 [https://github.com/ArimaGenomics/mapping\\_pipeline](https://github.com/ArimaGenomics/mapping_pipeline)) and chromosome construction was  
150 conducted using the Salsa2<sup>45</sup> pipeline (available at <https://github.com/marbl/SALSA>) with default  
151 parameters and GATC as the cutting site for the restriction enzyme (DpnII). The Hi-C contact map for  
152 the scaffold assembly was constructed using PretextMap v0.1.9 and the chromatin contact matrix  
153 was manually corrected using PretextView v0.2.5 by following the Rapid Curation pipeline<sup>46</sup>  
154 (<https://gitlab.com/wtsi-grit/rapid-curation>). The curated assembly was assessed using gfastats to  
155 consist of 14 pseudomolecules and 1656 unplaced scaffolds with a total length of 9,350,839,849 bp  
156 (including gaps) and a contig N50 of 42.4 Mb (Table 1). The orientation and the chromosome name  
157 of each pseudomolecule were determined based on homology with the wheat cv. Chinese Spring  
158 assembly RefSeq2.1<sup>47</sup> A and B subgenomes, using dotplot comparison of sequence alignments  
159 produced by MUMmer's (v3.23<sup>48</sup>) nucmer aligner and viewed on Dot (available at  
160 <https://github.com/marianattestad/dot>). The pseudomolecules were thus, renamed into the 14  
161 *T. timopheevii* chromosomes, seven A<sup>t</sup> genome chromosomes with a total length of ~4.85 Gb and  
162 consisting of 119 contigs and seven G genome chromosomes with a total length of ~4.40 Gb and  
163 consisting of 529 contigs (Table 2).

164

165 **Table 1.** Summary statistics for genome assembly of *Triticum timopheevii*.

166

| Assembly characteristics                     | Value         |
|----------------------------------------------|---------------|
| Number of scaffolds                          | 1,670         |
| Total scaffold length (bp)                   | 9,350,839,849 |
| Scaffold N50 (bp)                            | 671,191,297   |
| Largest scaffold (bp)                        | 771,176,557   |
| No. of contigs                               | 2,304         |
| Total contig length (bp)                     | 9,350,587,949 |
| Average contig length (bp)                   | 4,058,415     |
| Contig N50 (bp)                              | 42,410,373    |
| Largest contig (bp)                          | 311,469,246   |
| GC content (%)                               | 46            |
| BUSCO evaluation (% of complete BUSCO genes) | 98.9          |

167

168

169 **Table 2.** Statistics of the *Triticum timopheevii* pseudomolecules

170

| Chromosome         | Length (bp)          | Number of contigs | Number of gene models |
|--------------------|----------------------|-------------------|-----------------------|
| Chr1A <sup>t</sup> | 614,431,332          | 14                | 9,982                 |
| Chr1G              | 495,016,746          | 50                | 8,777                 |
| Chr2A <sup>t</sup> | 767,071,137          | 10                | 12,729                |
| Chr2G              | 671,256,291          | 72                | 13,941                |
| Chr3A <sup>t</sup> | 670,741,101          | 10                | 9,489                 |
| Chr3G              | 671,191,297          | 75                | 13,452                |
| Chr4A <sup>t</sup> | 771,176,557          | 23                | 12,878                |
| Chr4G              | 643,128,204          | 68                | 9,936                 |
| Chr5A <sup>t</sup> | 694,350,238          | 12                | 11,821                |
| Chr5G              | 641,290,954          | 78                | 13,079                |
| Chr6A <sup>t</sup> | 585,824,631          | 33                | 9,011                 |
| Chr6G              | 589,079,669          | 87                | 11,406                |
| Chr7A <sup>t</sup> | 745,638,687          | 17                | 12,863                |
| Chr7G              | 692,654,486          | 99                | 14,851                |
| Unplaced scaffolds | 97,988,519           | 1656              | 2,110                 |
| <b>Total</b>       | <b>9,350,839,849</b> | <b>2,304</b>      | <b>166,325</b>        |

171

## 172 **Organellar genome assembly**

173

174 *De novo* assembly of the organelle genomes was carried out using the Oatk pipeline (available at  
175 <https://github.com/c-zhou/oatk>) with the cleaned HiFi reads. The circular chloroplast and  
176 mitochondrial contigs were assembled with a total size of 136,158 bp and 443,464 bp, respectively.  
177 Any unanchored contigs that aligned to these extranuclear genomes were removed from the final  
178 assembly.

179

## 180 **Genome annotation**

181

182 Gene models were generated from the *T. timopheevii* assembly using REAT - Robust and Extendable  
183 eukaryotic Annotation Toolkit (<https://github.com/EI-CoreBioinformatics/reat>) and Minos  
184 (<https://github.com/EI-CoreBioinformatics/minos>) which make use of Mikado<sup>49</sup>  
185 (<https://github.com/EI-CoreBioinformatics/mikado>), Portcullis  
186 (<https://github.com/EI-CoreBioinformatics/portcullis>) and many third-party tools (listed in the above repositories). A  
187 consistent gene naming standard<sup>50</sup> was used to make the gene models uniquely identifiable.

188

### 189 **1. Repeat identification**

190

191 Repeat annotation was performed using EI-Repeat version 1.3.4 pipeline (<https://github.com/EI-CoreBioinformatics/eirepeat>)  
192 which uses third party tools for repeat calling. In the pipeline, RepeatModeler (v1.0.11 - <http://www.repeatmasker.org/RepeatModeler/>)  
193 was used for *de novo* identification of repetitive elements from the assembled *T. timopheevii* genome. High copy protein  
194 coding genes potentially included in the RepeatModeler library were identified and effectively  
195 removed by running RepeatMasker v4.0.7 using a curated set of high confidence *T. aestivum* coding  
196 genes to hard mask the RepeatModeler library; transposable element genes were first excluded from  
197 the *T. aestivum* coding gene set by running TransposonPSI (r08222010). Unclassified repeats were  
198 searched in a custom BLAST database of organellar genomes (mitochondrial and chloroplast  
199

200 sequences from *Triticum* in the NCBI nucleotide division). Any repeat families matching organellar  
201 DNA were also hard-masked. Repeat identification was completed by running RepeatMasker v4.0.72  
202 with a RepBase embryophyte library and with the customized RepeatModeler library (i.e. after  
203 masking out protein coding genes), both using the -nolow setting.

204

205

## 2. Reference guided transcriptome reconstruction

206

207 Gene models were derived from the RNA-Seq reads, Iso-Seq transcripts (122,253 high quality and 82  
208 low quality isoforms; Supplementary File 1) and Full-Length Non- Concatamer Reads (FLNC) using the  
209 REAT transcriptome workflow. HISAT2 v2.2.1<sup>51</sup> was selected as the short read aligner with Iso-Seq  
210 transcripts aligned with minimap2 v2.18-r1015<sup>52</sup>, maximum intron length was set as 50,000 bp and  
211 minimum intron length to 20bp. Iso-Seq alignments were required to meet 95% coverage and 90%  
212 identity. High-confidence splice junctions were identified by Portcullis v 1.2.4<sup>53</sup>. RNA-Seq Illumina  
213 reads were assembled for each tissue with StringTie2 v2.1.5<sup>54</sup> and Scallop v0.10.5<sup>55</sup>, while FLNC reads  
214 were assembled using StringTie2 (Table S5). Gene models were derived from the RNA-Seq  
215 assemblies and Iso-Seq and FLNC alignments with Mikado. Mikado was run with all Scallop,  
216 StringTie2, Iso-Seq and FLNC alignments and a second run with only Iso-Seq and FLNC alignments  
217 (Table S6).

218

219

## 3. Cross-species protein alignment

220

221 Protein sequences from 10 Poaceae species (Table S7) were aligned to the *T. timopheevii* assembly  
222 using the REAT Homology workflow with options --annotation\_filters aa\_len  
223 --alignment\_species Angiosp --filter\_max\_intron 20000 -- filter\_min\_exon 10 --alignment\_filters  
224 aa\_len internal\_stop intron\_len exon\_len splicing -- alignment\_min\_coverage 90 --junction\_f1\_filter  
225 40 --post\_alignment\_clip clip\_term\_intron-exon - -term5i\_len 5000 --term3i\_len 5000 --term5c\_len  
226 36 --term3c\_len 36. The REAT Homology workflow aligns proteins with spaln v2.4.7<sup>56</sup> and filters and  
227 generates metrics to remove misaligned proteins. Simultaneously, the same protein set were also  
228 aligned using miniprot v0.3<sup>57</sup> and similarly filtered as in the REAT homology workflow. The aligned  
229 proteins from both methods were clustered into loci and a consolidated set of gene models were  
230 derived via Mikado.

231

232

## 4. Evidence guided gene prediction

233

234 The evidence guided annotation of protein coding genes based on repeats, RNA-Seq mappings,  
235 transcript assembly and alignment of protein sequences was created using the REAT prediction  
236 workflow. The pipeline has four main steps: (1) the REAT transcriptome and homology Mikado  
237 models are categorised based on alignments to UniProt proteins to identify models with likely full-  
238 length CDS and which meet basic structural checks i.e., having complete but not excessively long  
239 UTRs and not exceeding a minimum CDS/cDNA ratio. A subset of gene models is then selected from  
240 the classified models and used to train the AUGUSTUS gene predictor<sup>58</sup>; (2) Augustus is run in both  
241 *ab initio* mode and with extrinsic evidence generated in the REAT transcriptome and homology runs  
242 (repeats, protein alignments, RNA-Seq alignments, splice junctions, categorised Mikado models).  
243 Three evidence guided AUGUSTUS predictions are created using alternative bonus scores and  
244 priority based on evidence type; (3) AUGUSTUS models, REAT transcriptome/homology models,  
245 protein and transcriptome alignments are provided to EvidenceModeler<sup>59</sup> (EVM) to generate  
246 consensus gene structures; (4) EVM models are processed through Mikado to add UTR features and  
247 splice variants.

248

249

## 5. Projection of gene models from *Triticum aestivum*

250

251 A reference set of hexaploid wheat gene models was derived from public gene sets (IWGSC<sup>60</sup> and 10+  
252 wheat<sup>26</sup>) projected onto the IWGSC RefSeq v1.0 assembly<sup>60</sup>; a filtered and consolidated set of models  
253 was derived with Minos, with a primary model defined for each gene. Models were scored on a  
254 combination of intrinsic gene structure characteristics, evidence support (protein and transcriptome  
255 data) and consistency in gene structure across the input gene models. The Minos primary models  
256 were classified as full-length or partial based on alignment to a filtered magnoliopsida Swiss-Prot  
257 TrEMBL database. This assignment, together with criteria for gene structure characteristics and the  
258 original confidence classification, was used to classify models into 6 categories (Platinum, Gold,  
259 Silver, Bronze, Stone and Paper), with Platinum being the highest confidence category for models  
260 assessed as full-length, with an original confidence classification of "high", meeting structural checks  
261 for number of UTR and CDS/cDNA ratio and which were assessed as consistently annotated across  
262 the input gene sets. Reclassification resulted in 55,319 Platinum, 24,789 Gold, 11,968 Silver, 61,845  
263 Bronze, 110,518 Stone and 115,336 Paper genes. The four highest confidence categories Platinum,  
264 Gold, Silver and Bronze were projected onto the *T. timopheevii* assembly with Liftoff v1.5.1<sup>61</sup>, only  
265 those models transferred fully with no loss of bases and identical exon/intron structure were  
266 retained (<https://github.com/luventurini/ei-liftover>). Similarly, high confidence genes annotated in  
267 the hexaploid wheat cv. Chinese Spring RefSeq v2.1 assembly<sup>47</sup> were projected onto the  
268 *T. timopheevii* genome assembly with Liftoff, and only those models transferred fully with no loss of  
269 bases and identical exon/intron structure were retained. Among these, gene models with the  
270 attribute "manually\_curated" in the original Refseq v2.1 assembly were extracted as a set.

271

272

## 6. Gene model consolidation

273

274 The final set of gene models was selected using Minos (Table 3). Minos is a pipeline that generates  
275 and utilises metrics derived from protein, transcript, and expression data sets to create a  
276 consolidated set of gene models. In this annotation, the following gene models were filtered and  
277 consolidated into a single set of gene models using Minos:

278

- 279 1. The three alternative evidence guided Augustus gene builds described earlier.
- 280 2. The gene models derived from the REAT transcriptome runs described earlier.
- 281 3. The gene models derived from the REAT homology runs described earlier.
- 282 4. The gene models derived from the REAT prediction run (AUGUSTUS and EVM-Mikado)  
described earlier.
- 283 5. The gene models derived from projecting public and curated *T. aestivum* gene models of  
284 varying confidence levels onto the *T. timopheevii* genome as described earlier.
- 285 6. IWGSC Refseq v2.1 models identified as "manually\_curated" projected onto the  
286 *T. timopheevii* genome as described earlier.

287

288

**Table 3.** Summary statistics for the final structural annotation of the *T. timopheevii* genome.

289

| Stat                             | Value    |
|----------------------------------|----------|
| Number of genes                  | 166,325  |
| Number of Transcripts            | 218,100  |
| Transcripts per gene             | 1.31     |
| Number of monoexonic genes       | 51,702   |
| Monoexonic transcripts           | 53,192   |
| Transcript mean size cDNA (bp)   | 1,658.27 |
| Transcript median size cDNA (bp) | 1412     |
| Min cDNA                         | 96       |
| Max cDNA                         | 20,589   |

|                                 |          |
|---------------------------------|----------|
| Total exons                     | 997,779  |
| Exons per transcript            | 4.57     |
| Exon mean size (bp)             | 362.47   |
| CDS mean size (bp)              | 277.55   |
| Transcript mean size CDS (bp)   | 1,171.61 |
| Transcript median size CDS (bp) | 957      |
| Min CDS                         | 0        |
| Max CDS                         | 20,283   |
| Intron mean size (bp)           | 628.4    |
| 5'UTR mean size (bp)            | 182.93   |
| 3'UTR mean size (bp)            | 294.58   |

290

291 Gene models were classified as biotypes `protein_coding_gene`, `predicted_gene` and  
 292 `transposable_element_gene`, and assigned as high or low confidence (Table 3) based on the criteria  
 293 below:

- 294 a) **High confidence (HC) protein\_coding\_gene**: Any protein coding gene where any of its  
 295 associated gene models have a BUSCO v5.4.7<sup>62</sup> protein status of Complete/Duplicated OR  
 296 have diamond v0.9.36 coverage (average across query and target coverage)  $\geq 90\%$  against  
 297 the listed Poaceae protein datasets (section 3; Supplemental File 2) or UniProt  
 298 magnoliopsida proteins. Or alternatively have average blastp coverage (across query and  
 299 target coverage)  $\geq 80\%$  against the listed protein datasets/UniProt magnoliopsida AND have  
 300 transcript alignment F1 score (average across nucleotide, exon and junction F1 scores based  
 301 on RNA-Seq transcript assemblies)  $\geq 60\%$ .
- 302 b) **Low confidence (LC) protein\_coding\_gene**: Any protein coding gene where all its associated  
 303 transcript models do not meet the criteria to be considered as high confidence protein  
 304 coding transcripts.
- 305 c) **HC transposable\_element\_gene**: Any protein coding gene where any of its associated gene  
 306 models have coverage  $\geq 40\%$  against the combined interspersed repeats (see section 1).
- 307 d) **LC transposable\_element\_gene**: Any protein coding gene where all its associated transcript  
 308 models do not meet the criteria to be considered as high confidence and assigned as a  
 309 `transposable_element_gene` (see c).
- 310 e) **LC predicted\_gene**: Any protein coding gene where all the associated transcript models do  
 311 not meet the criteria to be considered as high confidence protein coding transcripts. In  
 312 addition, where any of the associated gene models have average blastp coverage (across  
 313 query and target coverage)  $< 30\%$  against the listed protein datasets AND having a protein-  
 314 coding potential score  $< 0.25$  calculated using CPC2 0.1<sup>63</sup>.
- 315 f) **LC ncRNA gene**: Any gene model with no CDS features AND a protein-coding potential score  
 316  $< 0.3$  calculated using CPC2 0.1.
- 317 g) **Discarded models**: Any models having no BUSCO protein hit AND a protein alignment score  
 318 (average across nucleotide, exon and junction F1 scores based on protein alignments)  $< 0.2$   
 319 AND a transcript alignment F1 score (average across nucleotide, exon and junction F1 scores  
 320 based on RNA-Seq transcript assemblies)  $< 0.2$  AND a diamond coverage (target coverage)  
 321  $< 0.3$  AND Kallisto v0.44<sup>64</sup> expression score  $< 0.2$  from across RNA-Seq reads OR having short  
 322 CDS  $< 30$ bps. Any ncRNA genes (no CDS features) not meeting the ncRNA gene requirements  
 323 (f) were also excluded.

324

325 **Table 4.** Minos classified gene models.

326

| Biotype | Confidence | Gene | Transcript |
|---------|------------|------|------------|
|---------|------------|------|------------|



|                           |      |         |         |
|---------------------------|------|---------|---------|
| protein_coding_gene       | Low  | 73,844  | 79,329  |
| protein_coding_gene       | High | 67,107  | 112,338 |
| transposable_element_gene | Low  | 15,871  | 16,231  |
| predicted_gene            | Low  | 4,974   | 5,033   |
| transposable_element_gene | High | 3,258   | 3,410   |
| ncRNA_gene                | Low  | 1,271   | 1,759   |
| <b>Total</b>              |      | 166,325 | 218,100 |

327

328

Gene model distribution across the pseudomolecules and unplaced scaffolds is shown in Table 2 and gene density of 164,617 protein coding genes across the *T. timopheevii* genome is shown in Fig. 2b.

329

330

## 7. Functional annotation

331

332

333

334

335

336

337

338

339

340

341

342

343

344

345

346

347

348

349

350

351

352

353

354

355

356

357

Since *T. timopheevii* is known as an important source for genetic variation for resistance against major diseases of wheat as described above and as the majority of cloned disease-resistance genes encode nucleotide-binding leucine-rich repeats (NLRs)<sup>67,68</sup>, we analysed the genomic distribution of all gene models annotated as NB-ARC domain-containing/disease resistance proteins in the genome assembly (Fig. 2c).

363

364

### Generation of PacBio DNA methylation profile

365

366

367

368

369

Methylation in CpG context was inferred with ccsmeth v0.3.2<sup>69</sup>, using the kinetics data from PacBio CCS subreads obtained during HMW DNA sequencing. The methylation prediction for CCS reads were called using the model "model\_ccsmeth\_5mCpG\_call\_mods\_atbigru2s\_b21.v2.ckpt". The reads with the MM+ML tags were aligned to the pseudomolecules in the *T. timopheevii* assembly using BWA

370 v0.7.17<sup>70</sup>. The methylation frequency was calculated at genome level with the modbam files and the  
371 aggregate mode of ccsmeth with the model  
372 “model\_ccsmeth\_5mCpG\_aggregate\_attbigru\_b11.v2p.ckpt”. The genomic distribution of 5mC  
373 modifications across *T. timopheevii* (Fig. 2d) shows that G genome chromosomes have more  
374 methylation with an average of ~401.8 Kb methylated bases per 10 Mb bin as compared to the A<sup>t</sup>  
375 genome chromosomes with an average of ~385.5 Kb per 10 Mb bin.  
376

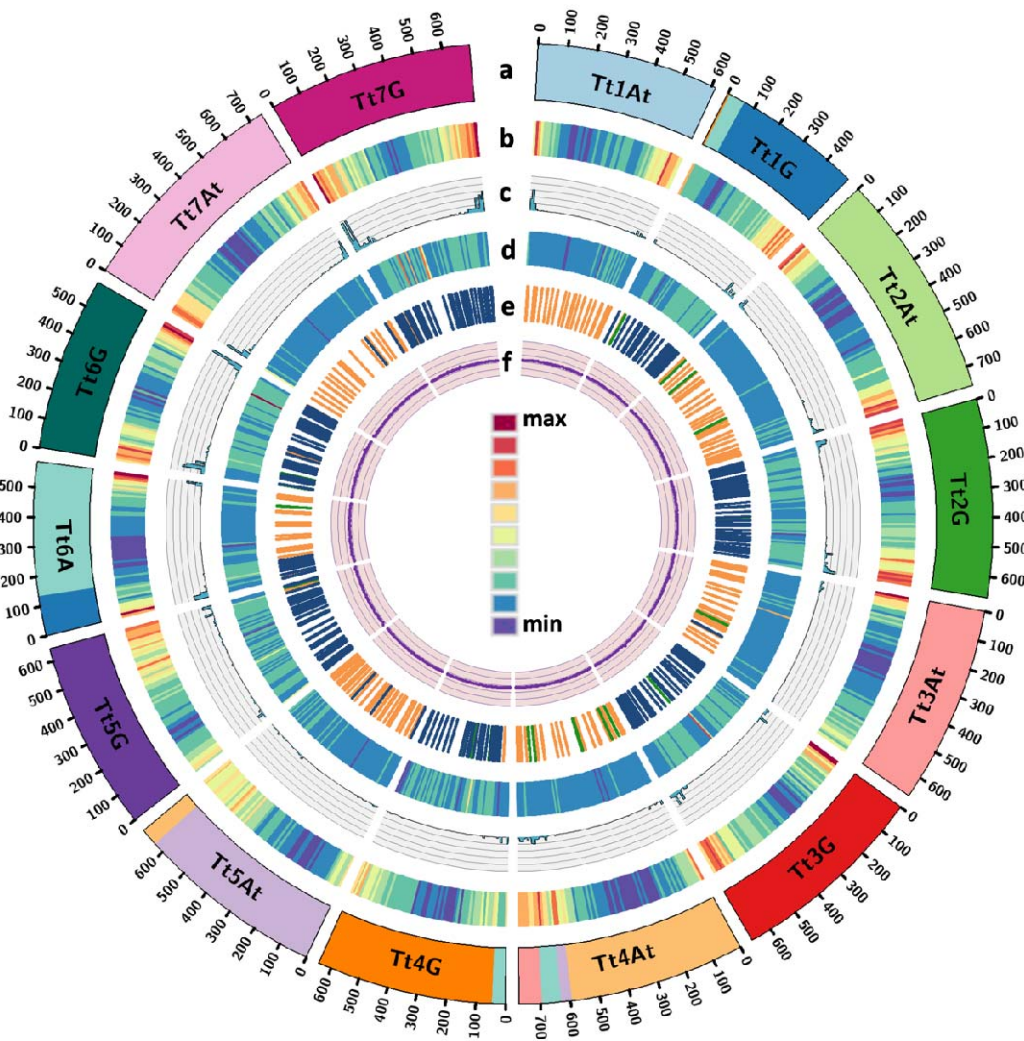

377  
378  
379 **Figure 2.** Circos plot<sup>71</sup> of features of the chromosome-scale assembly of *T. timopheevii* showing (a)  
380 major translocations with the *T. timopheevii* genome as observed through collinearity analysis  
381 against *T. turgidum*, (b) gene density (of all gene models), (c) NLR density (max count 87), (d) DNA  
382 methylation (5mC modification) density, (e) distribution of KASP markers based on SNPs with bread  
383 wheat cv. Chinese Spring<sup>29</sup> and (f) GC content. Tt in chromosome name represents *T. timopheevii*.  
384

### 385 Comparative genome analysis

386  
387 Synteny and collinearity analysis of the *T. timopheevii* gene set against the reference gene set of wild  
388 emmer wheat *T. turgidum* accession Zavitan WEWSeq v1.0<sup>72,73</sup> (available from Ensembl<sup>74</sup> plants) was

389 computed using MCSanX<sup>75</sup> with defaults parameters and results viewed using SynVisio<sup>76,77</sup>  
390 (<https://synvisio.github.io/>) and shown in Fig. 3a-b. A and G genome chromosomes of *T. timopheevii*  
391 maintain synteny with the A and B genome chromosomes of tetraploid wheat albeit some inversions,  
392 deletions and translocations shown in red Fig. 3a. Analysis of large chromosome translocations  
393 within the *T. timopheevii* genome confirmed previous reports<sup>7-9</sup> of 5 translocation events including  
394 T4A<sup>L</sup>/5A<sup>L</sup> (1), T6A<sup>S</sup>/1GS/4GS (2-4) and T4A<sup>L</sup>/3A<sup>L</sup> (5). Fig. 3b shows the composition of the  
395 chromosomes involved (or suspected to be) in the translocation events as compared to the  
396 composition of homoeologous chromosomes in tetraploid wheat (also depicted in Fig. 2a). It shows  
397 that Chr4GS had retained a part of Chr6A<sup>S</sup> during the fourth reciprocal translocation event between  
398 T4A<sup>L</sup>/4GS<sup>8</sup> unlike previous reports that indicated that all of Chr6A<sup>S</sup> was translocated to Chr4A<sup>L</sup>. It  
399 was also confirmed that unlike tetraploid (and hexaploid) wheat there is no inversion of Chr4A<sup>L</sup> (also  
400 shown in Fig. 3c) and no reciprocal translocation between Chr7G and Chr4A<sup>L</sup><sup>78,79</sup> indicating that  
401 although the T4AL/5AL was inherited from *T. urartu*<sup>8,80</sup>, the following inversion of Chr4AL and  
402 translocation with Chr7B were specific to the tetraploid and hexaploid wheat species.  
403

404 Dotplot comparison of sequence alignments (as described earlier) between the *T. timopheevii*  
405 pseudomolecules and the reference genome of *T. turgidum* accession Zavitan<sup>72,73</sup> WEWSeq v1.0 also  
406 confirmed the synteny, collinearity and translocations (Fig. 3c) as observed by comparing the gene  
407 sets between these two species (Fig. 3a-b).  
408

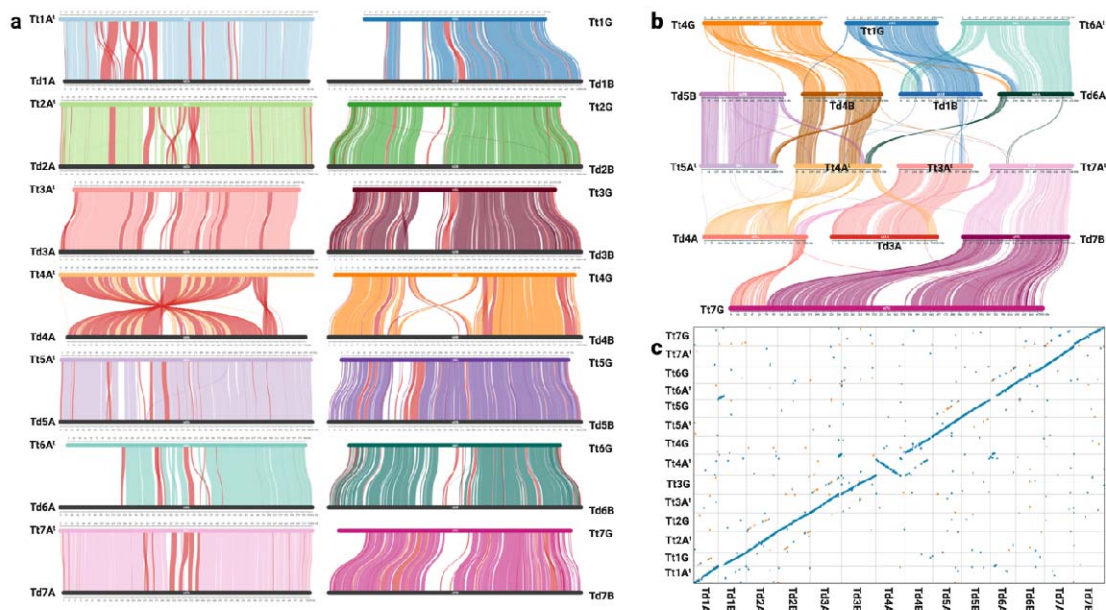

409  
410  
411 **Figure 3.** Comparative analysis of *T. timopheevii* (Tt) and *T. turgidum* (Td) genomes. (a) SynVisio plots  
412 showing synteny and collinearity between the two genomes with rearrangements in red, (b) SynVisio  
413 plots showing major translocations within the *T. timopheevii* chromosomes as compared to  
414 tetraploid wheat, and (c) Dotplot comparison of the sequence alignments between the  
415 chromosomes of the two genomes.  
416

### 417 Phylogeny analysis

418  
419 Orthofinder<sup>81</sup> (<https://github.com/davidemms/OrthoFinder>) was used to locate orthologous genes  
420 between *T. timopheevii* (Tt) and other *Aegilops* and wheat annotations using protein coding genes  
421 (HC + LC). We used the S genome annotations from three *Aegilops* species<sup>82</sup>: *Ae. longissima*, *Ae.*  
422 *speltoides* and *Ae. sharonensis*, the A genome annotation of *T. urartu*, the D genome annotation of

423 *Ae. tauschii*, the AB annotation of wild emmer wheat (WEW) accession Zavitan<sup>72</sup> and durum wheat  
424 (DW) cv. Svevo<sup>83</sup> and the ABD annotation of hexaploid bread wheat (BW) cv. Chinese Spring<sup>60</sup>  
425 (available from Ensembl plants). The polyploid annotations (*T. timopheevii*, WEW, DW and BW) were  
426 split into the subgenomes, and each was handled separately. The species tree (Fig. 4) was viewed  
427 using the ETE Toolkit tree viewer<sup>84</sup> (available at <http://etetoolkit.org/treeview/>) and confirms that  
428 the G genome of *T. timopheevii* is more closely related to the S genome of *Ae. speltoides* than the B  
429 genomes of tetraploid and hexaploid wheats.

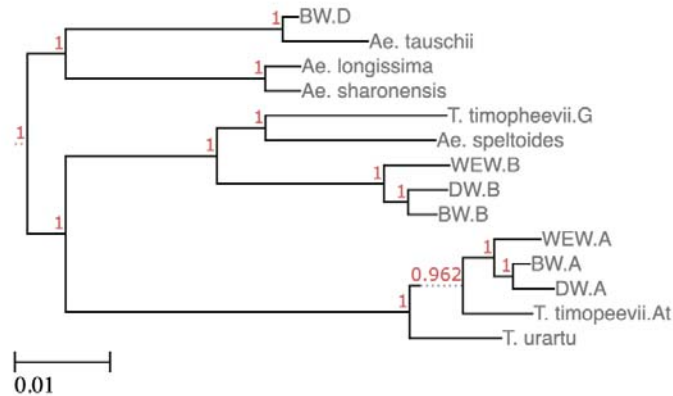

430  
431

432 **Figure 4.** Phylogenetic tree based on orthofinder analysis of all protein coding genes. Branch values  
433 in red correspond to orthofinder support values. BW, bread wheat cv. Chinese Spring; DW durum  
434 wheat cv. Svevo; WEW, wild emmer wheat accession Zavitan.

435

#### 436 **Genome visualisation**

437

438 A genome browser for the assembly of *T. timopheevii* generated in this study is currently being  
439 hosted at GrainGenes<sup>85</sup> (<https://wheat.pw.usda.gov/jb?data=/ggds/whe-timopheevii>) with tracks for  
440 annotated gene models and repeats and BLAST functionality available at  
441 <https://wheat.pw.usda.gov/blast/>.

442

#### 443 **Data Records**

444

445 The raw sequence files for the HiFi, Hi-C, RNA-Seq and IsoSeq reads were deposited in the European  
446 Nucleotide Archive (ENA) under accession number [PRJEB71660](https://ena.ebi.ac.uk/ena/browser/view/PRJEB71660). The final chromosome-scale  
447 assembly consisting of the nuclear and organelle genomes was deposited at ENA under the accession  
448 number GCA\_963921465.2.

449

450 The genome assemblies, gene model and repeat annotations, methylation profile and Hi-C contact  
451 map are also available at on DRYAD Digital Repository<sup>86</sup> (<https://doi.org/10.5061/dryad.mpg4f4r6p>).

452

#### 453 **Technical Validation**

454

#### 455 **Assessment of genome assembly and annotation**

456

457 The final curated assembly was assessed by mapping the trimmed Hi-C reads to the post-curated  
458 assembly (as described above for scaffolding) and generating a final Hi-C contact map using  
459 PretextMap v0.1.9 and viewed using PretextView v0.2.5. It showed a dense dark blue pattern along  
460 the diagonal revealing no potential mis-assemblies (Fig. 5). The anti-diagonals in the Hi-C contact  
461 matrix were expected and have been reported for other relatively large plant genomes such as those

462 from the Triticeae tribe<sup>87,88</sup> as they correspond to the typical Rab1 configuration of Triticeae  
463 chromosomes<sup>89,90</sup>.

464

465 The BUSCO v5.3.2<sup>42</sup> (-l embryophyta\_odb10) score of 98.9% (0.6% fragmented and 0.5% missing  
466 BUSCOs; Table S8) at the genome level indicates a high completeness of the *T. timopheevii* assembly.  
467 The quality of the *T. timopheevii* assembly was assessed with Merquy<sup>91</sup> based on the PacBio HiFi  
468 reads using 31-mers. The QV (consensus quality value) and k-mer completeness scores were 65.5  
469 and 97.8%, respectively.

470

471 Completeness of the gene model prediction was also evaluated using BUSCO and produced a score  
472 of 99.7% (0.1% fragmented and 0.2% missing BUSCOs; Table S8). The number of HC gene models  
473 (70,365) is in the range of a tetraploid Triticeae species (34,000–43,000 high-confidence gene models  
474 per haploid genome)<sup>92</sup>.

475

476 Of the total 14 chromosomes, we found telomeric repeats on both ends for 5 chromosomes (1A<sup>t</sup>, 2G,  
477 3A<sup>t</sup>, 6A<sup>t</sup>, and 7G) and on one end for 7 chromosomes (1GL, 2A<sup>t</sup>S, 3GL, 4GS, 5GL, 6GL and 7A<sup>t</sup>L).

478

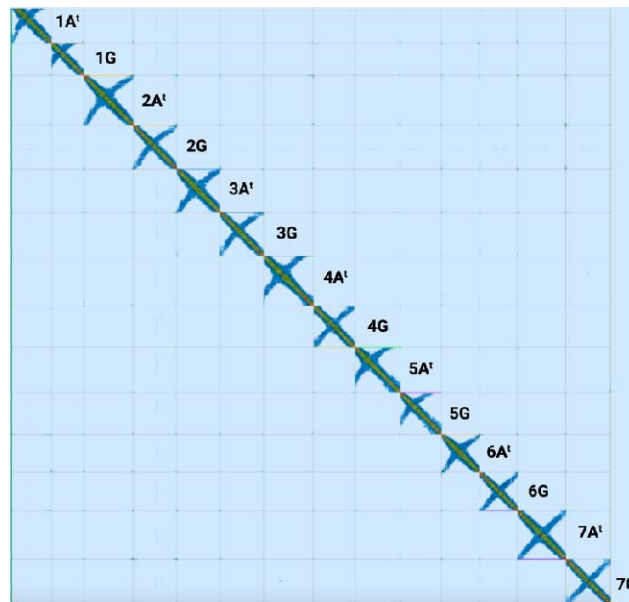

479

480

481 **Figure 5.** Contact map after the integration of the Hi-C data and manual correction using  
482 PretextView.

483

#### 484 **Code availability**

485 All software and pipelines were executed according to the manual and protocol of published tools.  
486 No custom code was generated for these analyses.

487

#### 488 **Acknowledgements**

489 This work was supported by the Biotechnology and Biological Sciences Research Council [grant  
490 number BB/P016855/1] as part of the Developing Future Wheat (DFW) programme. Part of this work  
491 was also delivered via Transformative Genomics the BBSRC funded National Bioscience Research  
492 Infrastructure (BBS/E/ER/23NB0006) at Earlham Institute by members of the Genomics Pipelines and  
493 Core Bioinformatics Groups. EY and TS were supported by the US. Department of Agriculture,  
494 Agricultural Research Service, Project No. 2030–21000-056-00D.

495

#### 496 **Author contributions**

497 SuG, JK and IK designed the study and obtained funding for it. CY, DuS and SA carried out plant  
498 maintenance and nucleic acid extraction. SuG, MW and LY generated the genome assembly. SuG and  
499 JC carried out manual curation of the assembly. SrG and DaS carried out the genome annotation. EY  
500 and TS generated the genome browser. SuG wrote the initial manuscript. All authors have read and  
501 approved the final manuscript.

502

### 503 **Competing interests**

504 The authors declare no competing interests.

505

### 506 **References**

507

508 1. Dvořák, J., Terlizzi, P. d., Zhang, H.-B., Resta, P. The evolution of polyploid wheats: identification of  
509 the A genome donor species. *Genome* **36**, 21-31 (1993).

510 2. Dvorak, J., Zhang, H.-B. Variation in repeated nucleotide sequences sheds light on the phylogeny of  
511 the wheat B and G genomes. *Proceedings of the National Academy of Sciences* **87**, 9640-9644 (1990).

512 3. Ahmed, H. I., et al. Einkorn genomics sheds light on history of the oldest domesticated wheat.  
513 *Nature* **620**, 830-838 (2023).

514 4. Rodriguez, S., Maestra, B., Perera, E., Díez, M., Naranjo, T. Pairing affinities of the B-and G-genome  
515 chromosomes of polyploid wheats with those of *Aegilops speltoides*. *Genome* **43**, 814-819 (2000).

516 5. Li, L. F., et al. Genome sequences of five Sitopsis species of *Aegilops* and the origin of polyploid  
517 wheat B subgenome. *Molecular plant* **15**, 488-503 (2022).

518 6. Dvořák, J. *Triticum* Species (Wheat). *Encyclopedia of Genetics*, 2060–2068 (2001).

519 7. Jiang, J., Gill, B. S. Different species-specific chromosome translocations in *Triticum timopheevii* and  
520 *T. turgidum* support the diphyletic origin of polyploid wheats. *Chromosome Research* **2**, 59-64 (1994).

521 8. Maestra, B., Naranjo, T. Structural chromosome differentiation between *Triticum timopheevii* and  
522 *T. turgidum* and *T. aestivum*. *Theoretical and Applied Genetics* **98**, 744-750 (1999).

523 9. Rodriguez, S., Perera, E., Maestra, B., Díez, M., Naranjo, T. Chromosome structure of *Triticum*  
524 *timopheevii* relative to *T. turgidum*. *Genome* **43**, 923-930 (2000).

525 10. Devi, U., et al. Development and characterisation of interspecific hybrid lines with genome-wide  
526 introgressions from *Triticum timopheevii* in a hexaploid wheat background. *BMC Plant Biol* **19**, 183  
527 (2019).

528 11. Brown-Guedira, G. L., Singh, S., Fritz, A. K. Performance and Mapping of Leaf Rust Resistance  
529 Transferred to Wheat from *Triticum timopheevii* subsp. *armeniicum*. *Phytopathology* **93**, 784-789  
530 (2003).

531 12. Singh, A. K., et al. Genetics and mapping of a new leaf rust resistance gene in *Triticum aestivum* L.  
532 × *Triticum timopheevii* Zhuk. derivative 'Selection G12'. *J Genet* **96**, 291-297 (2017).

533 13. Leonova, I. N., et al. Microsatellite mapping of a leaf rust resistance gene transferred to common  
534 wheat from *Triticum timopheevii*. *Cereal Research Communications* **38**, 211-219 (2010).

535 14. McIntosh, R., Gyrfas, J. *Triticum timopheevii* as a source of resistance to wheat stem rust.  
536 *Zeitschrift für Pflanzenzüchtung* **66**, 240-248 (1971).

- 537 15. Wu, S., Pumphrey, M., Bai, G. Molecular Mapping of Stem-Rust-Resistance Gene Sr40 in Wheat.  
538 *Crop Science* **49**, 1681-1686 (2009).
- 539 16. Allard, R., Shands, R. Inheritance of resistance to stem rust and powdery mildew in cytologically  
540 stable spring wheats derived from *Triticum timopheevii*. *Phytopathology* **44**, 266-274 (1954).
- 541 17. Perugini, L. D., Murphy, J. P., Marshall, D., Brown-Guedira, G. Pm37, a new broadly effective  
542 powdery mildew resistance gene from *Triticum timopheevii*. *Theoretical and Applied Genetics* **116**,  
543 417-425 (2008).
- 544 18. Qin, B., et al. Collinearity-based marker mining for the fine mapping of Pm6, a powdery mildew  
545 resistance gene in wheat. *Theoretical and Applied Genetics* **123**, 207-218 (2011).
- 546 19. Steed, A., et al. Identification of Fusarium Head Blight Resistance in *Triticum timopheevii*  
547 Accessions and Characterization of Wheat-T. *timopheevii* Introgression Lines for Enhanced  
548 Resistance. *Frontiers in Plant Science* **13**, (2022).
- 549 20. Malhipour, A., Gilbert, J., Fedak, G., Brûlé-Babel, A., Cao, W. Characterization of agronomic traits  
550 in a population of wheat derived from *Triticum timopheevii* and their association with Fusarium head  
551 blight. *European Journal of Plant Pathology* **144**, 31-43 (2016).
- 552 21. Brown-Guedira, G., et al. Evaluation of a collection of wild timopheevi wheat for resistance to  
553 disease and arthropod pests. *Plant disease* **80**, 928-933 (1996).
- 554 22. Badridze, G., Weidner, A., Asch, F., Börner, A. Variation in salt tolerance within a Georgian wheat  
555 germplasm collection. *Genetic resources and crop evolution* **56**, 1125-1130 (2009).
- 556 23. Yudina, R., Leonova, I., Salina, E., Khlestkina, E. Change in salt tolerance of bread wheat as a  
557 result of the introgression of the genetic material of *Aegilops speltoides* and *Triticum timopheevii*.  
558 *Russian Journal of Genetics: Applied Research* **6**, 244-248 (2016).
- 559 24. Lehmensiek, A., Bovill, W., Banks, P., Sutherland, M. Molecular characterization of a *Triticum*  
560 *timopheevii* introgression in a Wentworth/Lang population. (2008).
- 561 25. Hu, X., et al. Zn and Fe concentration variations of grain and flag leaf and the relationship with  
562 *NAM-G1* gene in *Triticum timopheevii* (Zhuk.) Zhuk. ssp. *timopheevii*. *Cereal Research*  
563 *Communications* **45**, 421-431 (2017).
- 564 26. Walkowiak, S., et al. Multiple wheat genomes reveal global variation in modern breeding. *Nature*  
565 **588**, 277-283 (2020).
- 566 27. Keilwagen, J., et al. Detecting major introgressions in wheat and their putative origins using  
567 coverage analysis. *Scientific Reports* **12**, 1908 (2022).
- 568 28. Keilwagen, J., et al. Finding needles in a haystack: identification of inter-specific introgressions in  
569 wheat genebank collections using low-coverage sequencing data. *Frontiers in Plant Science* **14**,  
570 (2023).
- 571 29. King, J., et al. Introgression of the *Triticum timopheevii* Genome Into Wheat Detected by  
572 Chromosome-Specific Kompetitive Allele Specific PCR Markers. *Frontiers in Plant Science* **13**, (2022).
- 573 30. Grewal, S., et al. Rapid identification of homozygosity and site of wild relative introgressions in  
574 wheat through chromosome-specific KASP genotyping assays. *Plant Biotechnol J* **18**, 743-755 (2020).

- 575 31. Belton, J. M., et al. Hi-C: a comprehensive technique to capture the conformation of genomes.  
576 *Methods* **58**, 268-276 (2012).
- 577 32. Wenger, A. M., et al. Accurate circular consensus long-read sequencing improves variant  
578 detection and assembly of a human genome. *Nature Biotechnology* **37**, 1155-1162 (2019).
- 579 33. Driguez, P., et al. LeafGo: Leaf to Genome, a quick workflow to produce high-quality de novo  
580 plant genomes using long-read sequencing technology. *Genome biology* **22**, 256 (2021).
- 581 34. Dong, L., et al. Single-molecule real-time transcript sequencing facilitates common wheat  
582 genome annotation and grain transcriptome research. *BMC Genomics* **16**, 1039 (2015).
- 583 35. Martin, M. Cutadapt removes adapter sequences from high-throughput sequencing reads. *2011*  
584 **17**, 3 (2011).
- 585 36. Bolger, A. M., Lohse, M., Usadel, B. Trimmomatic: a flexible trimmer for Illumina sequence data.  
586 *Bioinformatics* **30**, 2114-2120 (2014).
- 587 37. Marçais, G., Kingsford, C. A fast, lock-free approach for efficient parallel counting of occurrences  
588 of k-mers. *Bioinformatics* **27**, 764-770 (2011).
- 589 38. Wang, H., et al. Estimation of genome size using k-mer frequencies from corrected long reads.  
590 *arXiv:200311817 [q-bioGN]*, (2020).
- 591 39. Ranallo-Benavidez, T. R., Jaron, K. S., Schatz, M. C. GenomeScope 2.0 and Smudgeplot for  
592 reference-free profiling of polyploid genomes. *Nature Communications* **11**, 1432 (2020).
- 593 40. Cheng, H., Concepcion, G. T., Feng, X., Zhang, H., Li, H. Haplotype-resolved de novo assembly  
594 using phased assembly graphs with hifiasm. *Nature Methods* **18**, 170-175 (2021).
- 595 41. Formenti, G., et al. Gfastats: conversion, evaluation and manipulation of genome sequences  
596 using assembly graphs. *Bioinformatics* **38**, 4214-4216 (2022).
- 597 42. Simão, F. A., Waterhouse, R. M., Ioannidis, P., Kriventseva, E. V., Zdobnov, E. M. BUSCO: assessing  
598 genome assembly and annotation completeness with single-copy orthologs. *Bioinformatics* **31**, 3210-  
599 3212 (2015).
- 600 43. Laetsch, D., Blaxter, M. BlobTools: Interrogation of genome assemblies. *F1000Research* **6**, (2017).
- 601 44. Korb, J. O., Lee, C. Genome assembly and haplotyping with Hi-C. *Nature Biotechnology* **31**,  
602 1099-1101 (2013).
- 603 45. Ghurye, J., et al. Integrating Hi-C links with assembly graphs for chromosome-scale assembly.  
604 *PLOS Computational Biology* **15**, e1007273 (2019).
- 605 46. Howe, K., et al. Significantly improving the quality of genome assemblies through curation.  
606 *GigaScience* **10**, (2021).
- 607 47. Zhu, T., et al. Optical maps refine the bread wheat *Triticum aestivum* cv. Chinese Spring genome  
608 assembly. *The Plant Journal* **107**, 303-314 (2021).
- 609 48. Kurtz, S., et al. Versatile and open software for comparing large genomes. *Genome biology* **5**, R12  
610 (2004).



- 611 49. Venturini, L., Caim, S., Kaithakottil, G. G., Mapleson, D. L., Swarbreck, D. Leveraging multiple  
612 transcriptome assembly methods for improved gene structure annotation. *GigaScience* **7**, (2018).
- 613 50. Boden, S. A., et al. Updated guidelines for gene nomenclature in wheat. *Theoretical and Applied*  
614 *Genetics* **136**, 72 (2023).
- 615 51. Kim, D., Paggi, J. M., Park, C., Bennett, C., Salzberg, S. L. Graph-based genome alignment and  
616 genotyping with HISAT2 and HISAT-genotype. *Nature Biotechnology* **37**, 907-915 (2019).
- 617 52. Li, H. Minimap2: pairwise alignment for nucleotide sequences. *Bioinformatics* **34**, 3094-3100  
618 (2018).
- 619 53. Mapleson, D., Venturini, L., Kaithakottil, G., Swarbreck, D. Efficient and accurate detection of  
620 splice junctions from RNA-seq with Portcullis. *GigaScience* **7**, (2018).
- 621 54. Kovaka, S., et al. Transcriptome assembly from long-read RNA-seq alignments with StringTie2.  
622 *Genome biology* **20**, 278 (2019).
- 623 55. Shao, M., Kingsford, C. Accurate assembly of transcripts through phase-preserving graph  
624 decomposition. *Nature Biotechnology* **35**, 1167-1169 (2017).
- 625 56. Gotoh, O. A space-efficient and accurate method for mapping and aligning cDNA sequences onto  
626 genomic sequence. *Nucleic Acids Research* **36**, 2630-2638 (2008).
- 627 57. Li, H. Protein-to-genome alignment with minimap2. *Bioinformatics* **39**, (2023).
- 628 58. Stanke, M., Morgenstern, B. AUGUSTUS: a web server for gene prediction in eukaryotes that  
629 allows user-defined constraints. *Nucleic Acids Research* **33**, W465-W467 (2005).
- 630 59. Haas, B. J., et al. Automated eukaryotic gene structure annotation using EVIDENCEModeler and  
631 the Program to Assemble Spliced Alignments. *Genome biology* **9**, R7 (2008).
- 632 60. IWGSC, et al. Shifting the limits in wheat research and breeding using a fully annotated reference  
633 genome. *Science* **361**, (2018).
- 634 61. Shumate, A., Salzberg, S. L. Liftoff: accurate mapping of gene annotations. *Bioinformatics* **37**,  
635 1639-1643 (2021).
- 636 62. Seppey, M., Manni, M., Zdobnov, E. M. in *Gene Prediction: Methods and Protocols* (ed. Kollmar  
637 M) BUSCO: Assessing Genome Assembly and Annotation Completeness (Springer New York, 2019).
- 638 63. Kong, L., et al. CPC: assess the protein-coding potential of transcripts using sequence features  
639 and support vector machine. *Nucleic Acids Research* **35**, W345-W349 (2007).
- 640 64. Bray, N. L., Pimentel, H., Melsted, P., Pachter, L. Near-optimal probabilistic RNA-seq  
641 quantification. *Nature Biotechnology* **34**, 525-527 (2016).
- 642 65. Consortium, U. UniProt: a hub for protein information. *Nucleic Acids Res* **43**, D204-212 (2015).
- 643 66. Jones, P., et al. InterProScan 5: genome-scale protein function classification. *Bioinformatics* **30**,  
644 1236-1240 (2014).

- 645 67. Kourelis, J., Van Der Hoorn, R. A. Defended to the nines: 25 years of resistance gene cloning  
646 identifies nine mechanisms for R protein function. *The Plant cell* **30**, 285-299 (2018).
- 647 68. Chen, R., Gajendiran, K., Wulff, B. B. H. R we there yet? Advances in cloning resistance genes for  
648 engineering immunity in crop plants. *Current opinion in plant biology* **77**, 102489 (2024).
- 649 69. Ni, P., et al. DNA 5-methylcytosine detection and methylation phasing using PacBio circular  
650 consensus sequencing. *Nature communications* **14**, 4054 (2023).
- 651 70. Li, H., Durbin, R. Fast and accurate short read alignment with Burrows–Wheeler transform.  
652 *bioinformatics* **25**, 1754-1760 (2009).
- 653 71. Krzywinski, M., et al. Circos: An information aesthetic for comparative genomics. *Genome Res* **19**,  
654 1639-1645 (2009).
- 655 72. Avni, R., et al. Wild emmer genome architecture and diversity elucidate wheat evolution and  
656 domestication. *Science* **357**, 93-97 (2017).
- 657 73. Zhu, T., et al. Improved Genome Sequence of Wild Emmer Wheat Zavitan with the Aid of Optical  
658 Maps. *G3 (Bethesda)* **9**, 619-624 (2019).
- 659 74. Martin, F. J., et al. Ensembl 2023. *Nucleic Acids Research* **51**, D933-D941 (2022).
- 660 75. Wang, Y., et al. MCScanX: a toolkit for detection and evolutionary analysis of gene synteny and  
661 collinearity. *Nucleic acids research* **40**, e49-e49 (2012).
- 662 76. Bandi, V., Gutwin, C. Interactive Exploration of Genomic Conservation. In *Proceedings of 46th*  
663 *Graphics Interface Conference* (Canadian Human-Computer Communications Society, 2020).
- 664 77. Bandi, V., et al. in *Plant Bioinformatics: Methods and Protocols* (ed. Edwards D) Visualization Tools  
665 for Genomic Conservation (Springer US, 2022).
- 666 78. Devos, K. M., Dubcovsky, J., Dvorak, J., Chinoy, C. N., Gale, M. D. Structural evolution of wheat  
667 chromosomes 4A, 5A, and 7B and its impact on recombination. *Theor Appl Genet* **91**, 282-288  
668 (1995).
- 669 79. Dvorak, J., et al. Reassessment of the evolution of wheat chromosomes 4A, 5A, and 7B. *Theor*  
670 *Appl Genet* **131**, 2451-2462 (2018).
- 671 80. King, I. P., et al. Detection of interchromosomal translocations within the Triticeae by RFLP  
672 analysis. *Genome* **37**, 882-887 (1994).
- 673 81. Emms, D., Kelly, S. OrthoFinder: phylogenetic orthology inference for comparative genomics.  
674 bioRxiv 466201, 2019.
- 675 82. Avni, R., et al. Genome sequences of three Aegilops species of the section Sitopsis reveal  
676 phylogenetic relationships and provide resources for wheat improvement. *The Plant Journal* **110**,  
677 179-192 (2022).
- 678 83. Maccaferri, M., et al. Durum wheat genome highlights past domestication signatures and future  
679 improvement targets. *Nature Genetics* **51**, 885-895 (2019).

- 680 84. Huerta-Cepas, J., Serra, F., Bork, P. ETE 3: Reconstruction, Analysis, and Visualization of  
681 Phylogenomic Data. *Molecular Biology and Evolution* **33**, 1635-1638 (2016).
- 682 85. Yao, E., et al. GrainGenes: a data-rich repository for small grains genetics and genomics. *Database*  
683 **2022**, (2022).
- 684 86. Grewal, S., et al. 2024. Triticum timopheevii genome assembly files [Dataset]. Dryad.  
685 <https://doi.org/10.5061/dryad.mpg4f4r6p>
- 686 87. Dong, P., et al. 3D chromatin architecture of large plant genomes determined by local A/B  
687 compartments. *Molecular plant* **10**, 1497-1509 (2017).
- 688 88. Mascher, M., et al. A chromosome conformation capture ordered sequence of the barley  
689 genome. *Nature* **544**, 427-433 (2017).
- 690 89. Anamthawat-Jónsson, K., Heslop-Harrison, J. Centromeres, telomeres and chromatin in the  
691 interphase nucleus of cereals. *Caryologia* **43**, 205-213 (1990).
- 692 90. Cowan, C. R., Carlton, P. M., Cande, W. Z. The polar arrangement of telomeres in interphase and  
693 meiosis. Rab1 organization and the bouquet. *Plant Physiology* **125**, 532-538 (2001).
- 694 91. Rhie, A., Walenz, B. P., Koren, S., Phillippy, A. M. Merqury: reference-free quality, completeness,  
695 and phasing assessment for genome assemblies. *Genome biology* **21**, 1-27 (2020).
- 696 92. Poretti, M., Praz, C. R., Sotiropoulos, A. G., Wicker, T. A survey of lineage-specific genes in  
697 Triticeae reveals de novo gene evolution from genomic raw material. *Plant Direct* **7**, e484 (2023).  
698
